# Supplementary material for: IL1RAP potentiates multiple oncogenic signaling pathways in AML
Source: PubMed Central journal article supplement — J Exp Med. 2018 Jun 4;215(6):1709–27. doi: 10.1084/jem.20180147 (PMC5987926; doi:10.1084/jem.20180147), 2018-06-04
Supplement: JEM_20180147_sm.pdf [file JEM_20180147_sm.pdf]

## Supplemental material

Mitchell et al., <https://doi.org/10.1084/jem.20180147>

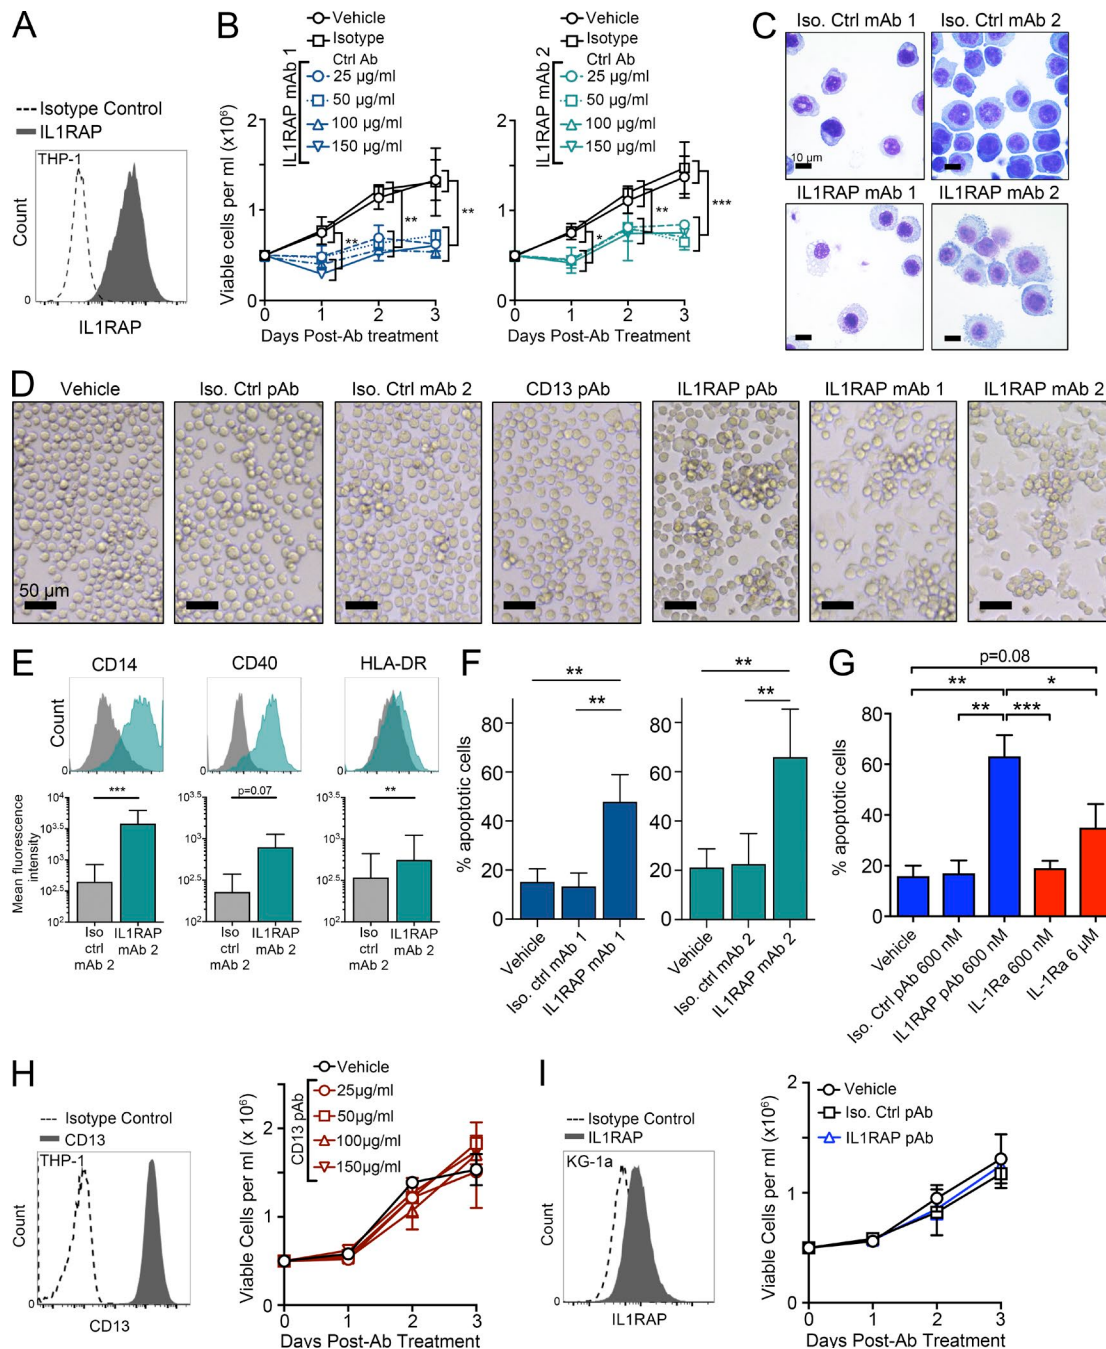

**Figure S1. Targeting of IL1RAP with antibodies reduces growth of AML cells by inducing differentiation and apoptosis.** (A) IL1RAP expression by flow cytometry in THP-1 cells using a fluorescently conjugated IL1RAP antibody. One representative experiment is shown. (B) Cell proliferation of THP-1 cells treated with different doses of two IL1RAP monoclonal antibodies. Data represent the mean  $\pm$  SD of two independent experiments. P-values were calculated using unpaired two-tailed *t* tests and multiple comparisons were corrected for using the Holm-Sidak method. (C) Morphology of THP-1 cells after treatment with 150  $\mu$ g/ml IL1RAP mAbs or isotype control mAbs for 24 hrs. 100 $\times$  magnification, 1.25 NA. (D) Photos of THP-1 cells in liquid culture after treatment with IL1RAP antibodies. 10 $\times$ , 0.25 NA. (E) Expression of macrophage differentiation markers in THP-1 cells by flow cytometry 24 h after addition of 150  $\mu$ g/ml IL1RAP mAb 2. Representative histograms are shown (top). Bar graphs (bottom) represent the mean  $\pm$  SD of four independent experiments. P-values were calculated using ratio-paired two-tailed *t* tests comparing raw MFI values of isotype control mAb 2 treated cells versus IL1RAP mAb 2 treated cells. (F) Percentage of apoptotic (annexinV<sup>+</sup>) THP-1 cells after treatment with 150  $\mu$ g/ml IL1RAP mAb 1 or mAb 2 for 72 hrs. Data represent the mean  $\pm$  SD of four independent experiments. P-values were calculated using unpaired two-tailed *t* tests. (G) Percentage of apoptotic (annexinV<sup>+</sup>) THP-1 cells after treatment with 600 nM IL1RAP pAb, 600 nM IL-1Ra, or 6  $\mu$ M IL-1Ra for 72 h. Data represent the mean  $\pm$  SD of three independent experiments. P-values were calculated using unpaired two-tailed *t* tests. (H) CD13 expression by flow cytometry in THP-1 cells using a fluorescently conjugated CD13 antibody. One representative experiment is shown (left). Cell proliferation of THP-1 cells treated with a CD13 pAb. Data represent the mean  $\pm$  SD of two technical replicates (right). (I) IL1RAP expression by flow cytometry in KG-1a cells using a fluorescently conjugated IL1RAP antibody. One representative experiment is shown (left). Cell proliferation of KG-1a cells treated with 150  $\mu$ g/ml IL1RAP pAb. Data represent the mean  $\pm$  SD of two independent experiments (right). \*, *P* < 0.05; \*\*, *P* < 0.01; \*\*\*, *P* < 0.001.

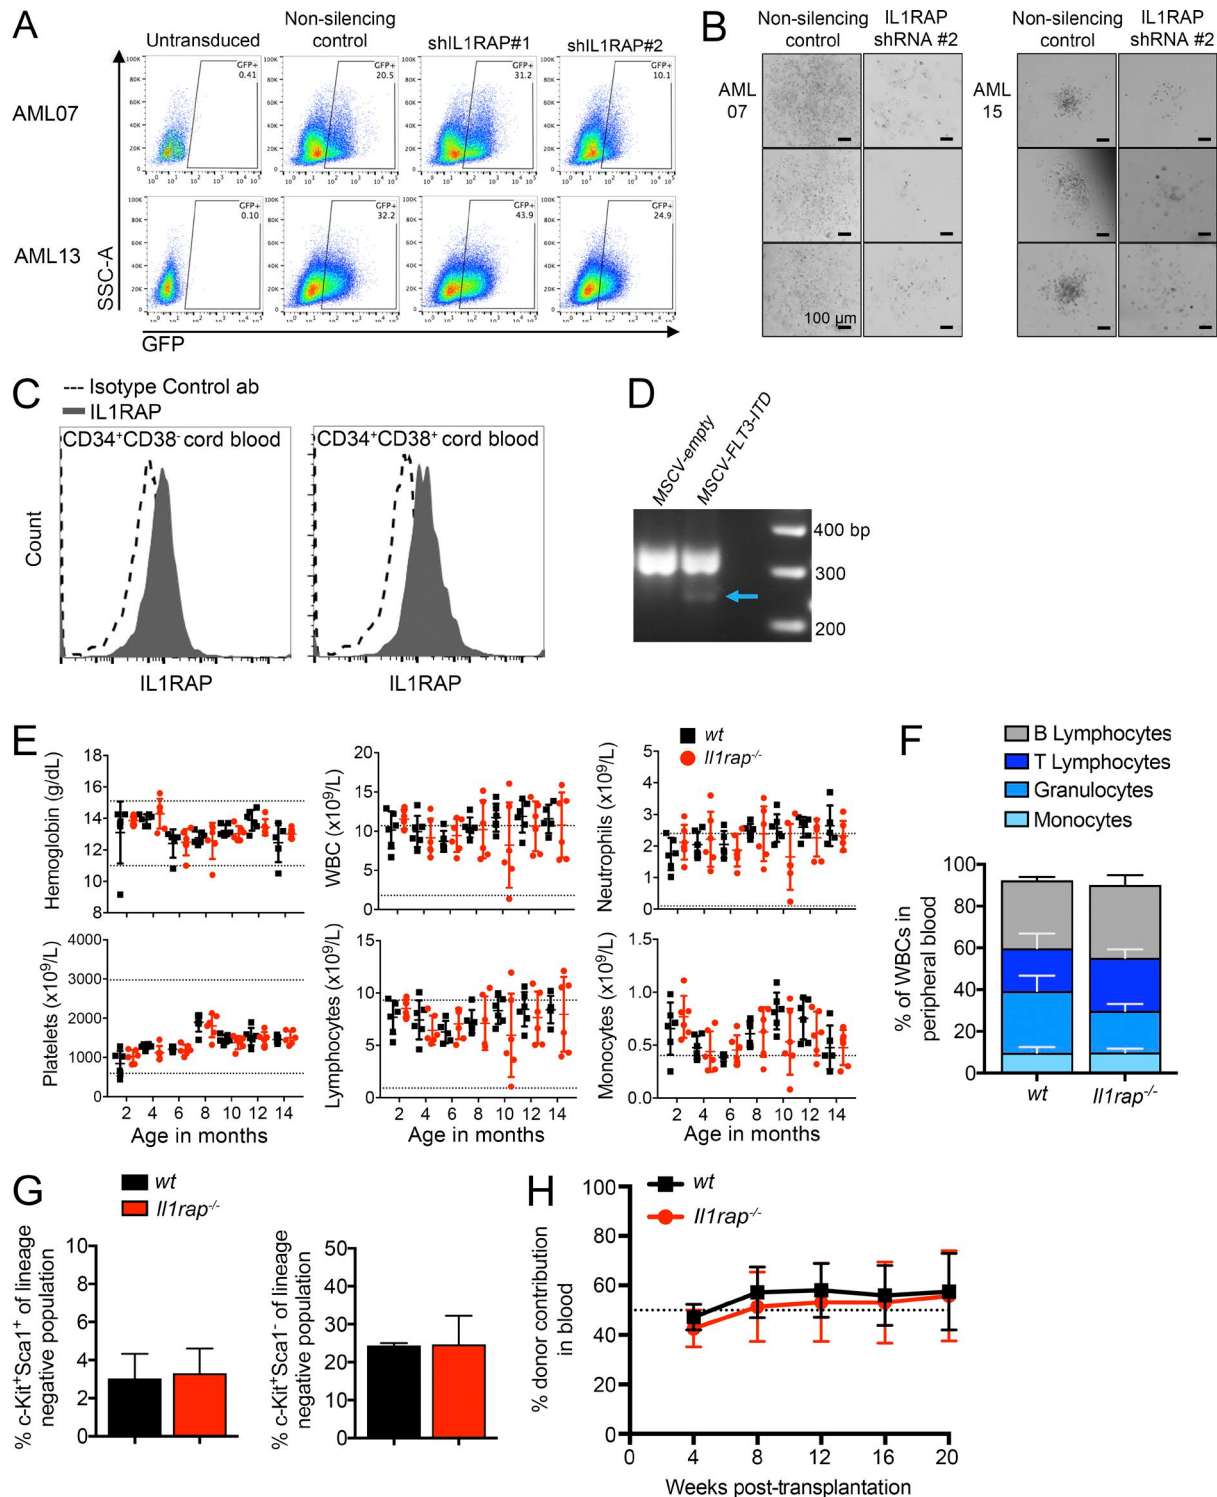

**Figure S2. Targeting of IL1RAP reduces growth of primary human AML cells without affecting healthy hematopoietic cells.** (A) IL1RAP shRNA transduction efficiencies of 2/5 primary AML samples used in Fig. 1 F. (B) Photos of individual colonies from primary AML colony assays in Fig. 1 F. 10 $\times$ , 0.25 NA. (C) IL1RAP expression by flow cytometry in CD34<sup>+</sup>CD38<sup>+</sup> and CD34<sup>+</sup>CD38<sup>+</sup> cells from a cord blood specimen using a fluorescently conjugated IL1RAP antibody. One representative experiment is shown. (D) PCR amplification of the *FLT3* gene on genomic DNA isolated from THP-1 cells transduced with MSCV-GFP empty control or MSCV-FLT3-ITD-GFP. The WT allele gives a 329-bp fragment, while the transgene (which includes the *FLT3*-ITD coding sequence only) gives a 239-bp sequence (indicated by blue arrow). (E) PB counts of *wt* and *Il1rap*<sup>-/-</sup> mice every 2 mo until 14 mo of age. WBC, white blood cells. Dotted lines indicate normal range. (F) Flow cytometry analysis of PB of *wt* and *Il1rap*<sup>-/-</sup> mice at 7.5 mo of age. B lymphocytes were identified as CD11b<sup>+</sup>Gr1<sup>+</sup>B220<sup>+</sup>; T lymphocytes, CD11b<sup>+</sup>Gr1<sup>+</sup>CD3<sup>+</sup>; granulocytes, CD11b<sup>+</sup>Gr1<sup>+</sup>; monocytes, CD11b<sup>+</sup>Gr1<sup>+</sup>. Data represent the mean  $\pm$  SD of six mice per group. (G) Percentage of c-Kit<sup>+</sup>Sca1<sup>+</sup> and c-Kit<sup>+</sup>Sca1<sup>+</sup> cells in the Lineage<sup>-</sup> population of BM of *wt* and *Il1rap*<sup>-/-</sup> mice by flow cytometry. Data represent the mean  $\pm$  SD of three mice per group. (H) Percentage of donor cells in the PB of mice transplanted *wt* or *Il1rap*<sup>-/-</sup> cells and *wt* competitor cells. Data represent the mean  $\pm$  SD of 13 mice transplanted with *wt* versus *wt* cells and 15 mice transplanted with *Il1rap*<sup>-/-</sup> versus *wt* cells.

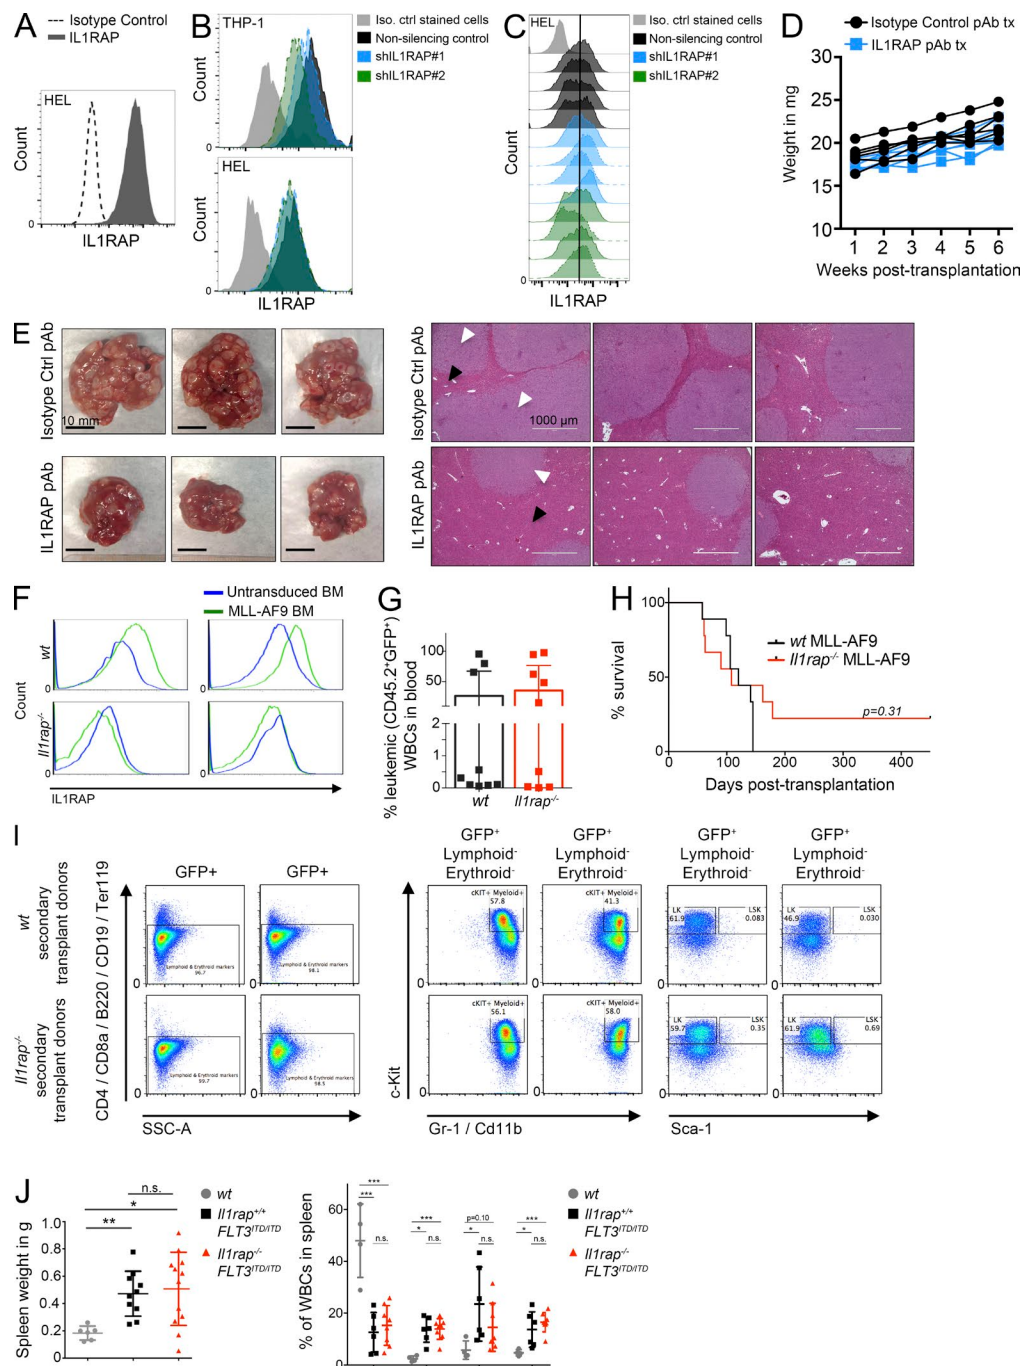

**Figure S3. Down-regulation, antibody targeting, or genetic deletion of IL1RAP inhibits AML pathogenesis in vivo.** (A) IL1RAP expression by flow cytometry in HEL cells using a fluorescently conjugated IL1RAP antibody. One representative experiment is shown. (B) Flow cytometry histograms showing IL1RAP protein knockdown achieved by IL1RAP shRNAs in cell lines used for xenografts in Fig. 2 B. (C) IL1RAP expression was measured in IL1RAP shRNA-transduced HEL cells isolated from BM of xenografted mice (Fig. 2 B) at day 30. HEL cells were identified by lack of mouse CD45.1 expression and presence of GFP (contained in the shRNA vectors). (D) Total body weights of antibody-treated THP-1 xenograft mice over the time course of the experiment in Fig. 2 C. tx, treatment. (E) Representative images of livers from antibody-treated THP-1 xenograft mice (left). H&E staining of liver sections from antibody-treated THP-1 xenograft mice (right). Each photo represents an individual mouse. THP-1 cell infiltration (white arrowheads) and residual normal mouse liver (black arrowheads) are indicated. 4 $\times$ , 0.13 NA. (F) IL1RAP expression in BM aspirates from MLL-AF9 leukemic mice by flow cytometry. MLL-AF9-transduced BM cells (GFP<sup>+</sup>, green histograms) and residual nonleukemic BM (GFP<sup>-</sup>, blue histograms) are shown. (G) Leukemic cell chimerism in BM of MLL-AF9 primary recipient mice 4 wk after transplant (experimental scheme is shown in Fig. 2 F). Data represent the mean  $\pm$  SD of nine mice per group. (H) Kaplan-Meier plot showing survival of primary recipient mice transplanted with wt or *Il1rap*<sup>-/-</sup> MLL-AF9 cells. P-value was calculated using log-rank (Mantel-Cox) test. (I) Immunophenotypes of wt and *Il1rap*<sup>-/-</sup> MLL-AF9 donor cells used for secondary transplant in Fig. 2 (G and H). (J) Left, spleen weights of wt, homozygous FLT3-ITD knock-in mice (*Il1rap*<sup>+/-</sup>FLT3<sup>ITD/ITD</sup>) and *Il1rap*<sup>-/-</sup>FLT3<sup>ITD/ITD</sup> mice at 12 mo of age. Right, flow cytometric analysis of spleen cell populations in wt, *Il1rap*<sup>+/-</sup>FLT3<sup>ITD/ITD</sup>, and *Il1rap*<sup>-/-</sup>FLT3<sup>ITD/ITD</sup> mice at 12 mo of age. P-values were calculated using unpaired two-tailed t-tests. \*,  $P < 0.05$ ; \*\*,  $P < 0.01$ ; \*\*\*,  $P < 0.001$ . n.s., not significant.

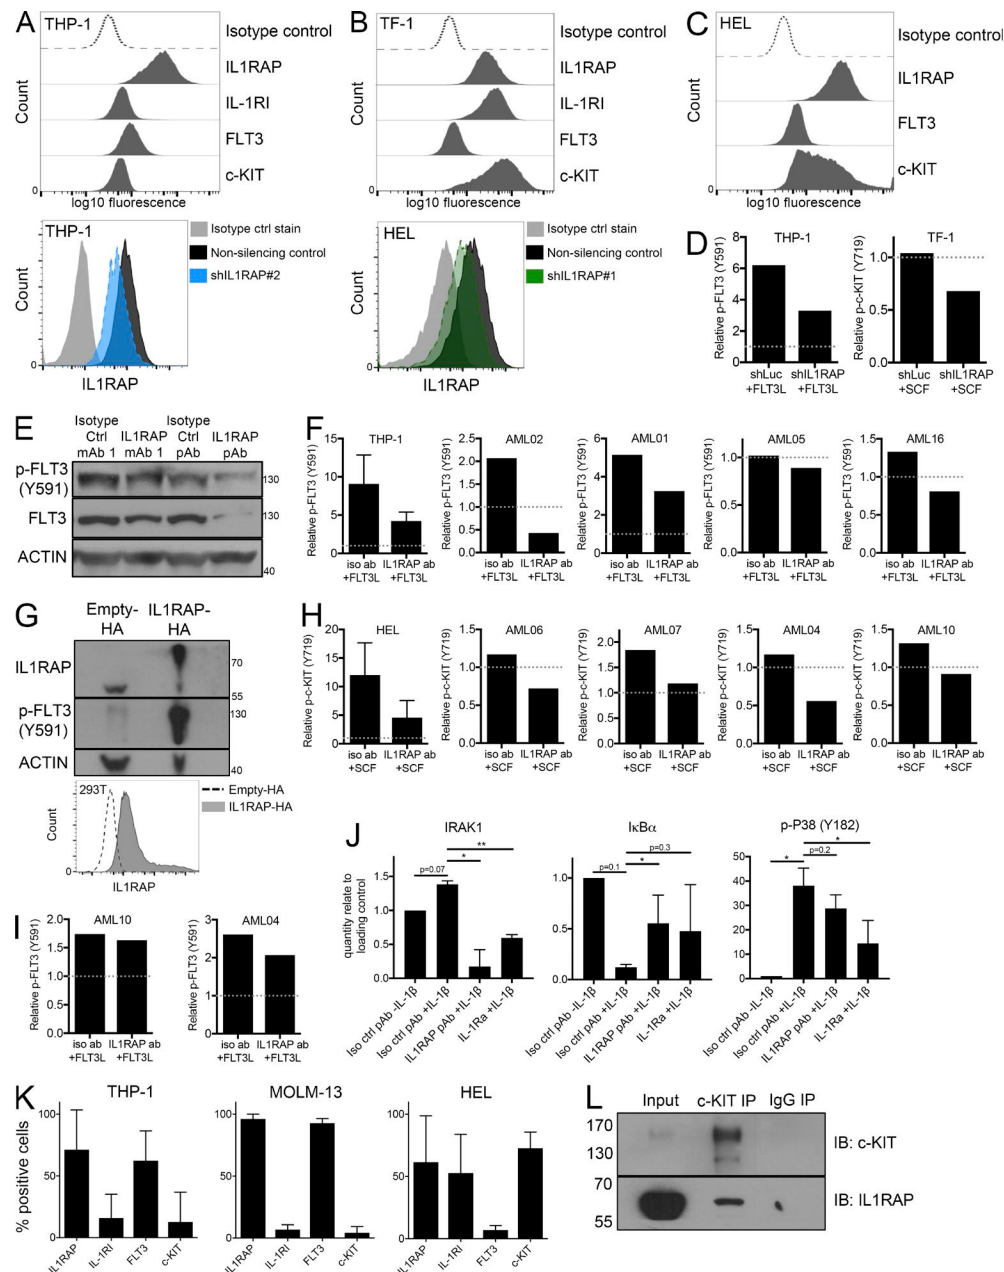

**Figure S4. Down-regulation, antibody targeting, or genetic deletion of IL1RAP inhibits FLT3 ligand and SCF-mediated signaling and growth, and IL1RAP interacts with their respective receptors.** (A) Top, surface expression of IL1RAP, IL-1RI, FLT3, and c-KIT by flow cytometry in THP-1 cells. One representative experiment is shown. Bottom, flow cytometry histograms showing IL1RAP protein knockdown achieved by IL1RAP shRNA#2 in THP-1 cells used for western blots in Fig. 3 A. (B) Top, surface expression of IL1RAP, IL-1RI, FLT3, and c-KIT by flow cytometry in TF-1 cells. One representative experiment is shown. Bottom, flow cytometry histograms showing IL1RAP protein knockdown achieved by IL1RAP shRNA#1 in TF-1 cells used for western blot in Fig. 3 F. (C) Surface expression of IL1RAP, FLT3, and c-KIT by flow cytometry in HEL cells. One representative experiment is shown. (D) Left, quantification of p-FLT3 (Y591) from Western blot in Fig. 3 A. Right, quantification of p-c-KIT (Y719) from western blot in Fig. 3 F. Dotted line indicates unstimulated, control shRNA-transduced cells. Protein levels relative to actin are shown. (E) THP-1 cells were treated with IL1RAP mAb, IL1RAP pAb, or isotype controls (100  $\mu$ g/ml) for 30 minutes. Protein levels were examined for p-FLT3 (Y591) and total FLT3 by immunoblotting. (F) Quantification of p-FLT3 (Y591) from Western blots in Fig. 3 (B and C). Dotted line indicates unstimulated, isotype control antibody treated cells. Protein levels relative to actin are shown. Error bars represent the mean  $\pm$  SD of independent experiments. (G) 293T cells were transfected with HA-tagged IL1RAP and examined for IL1RAP and p-FLT3 (Y591) 18 h later by Western blot (top). Surface overexpression of IL1RAP in 293T cells by flow cytometry (bottom). (H) Quantification of p-c-KIT (Y719) from Western blots in Fig. 3 (G and H). Dotted line indicates unstimulated, isotype control antibody treated cells. Protein levels relative to actin are shown. Error bars represent the mean  $\pm$  SD of independent experiments. (I) Quantification of p-FLT3 (Y591) from Western blots in Fig. 3 D. Dotted line indicates unstimulated, isotype control antibody treated cells. Protein levels relative to ACTIN are shown. (J) Quantification of Western blot in Fig. 3 I. Protein levels relative to ACTIN are shown. Data represent the mean  $\pm$  SD of two independent experiments. P-values were calculated using unpaired two-tailed *t* tests. (K) Surface expression of IL1RAP, IL-1RI, FLT3, and c-KIT by flow cytometry in AML cell lines used in Fig. 4 (A–G). “Positive” gates were set using a fluorescent isotype control antibody. Data represent the mean  $\pm$  SD of two or more independent experiments. (L) Coimmunoprecipitation of endogenous c-KIT in protein lysates from THP-1 cells using an independent c-KIT antibody. Immunoblot was performed for c-KIT and IL1RAP. \*, *P* < 0.05; \*\*, *P* < 0.01.

Table S1. **Absolute colony number output for IL1RAP shRNA-transduced primary AML samples used in Fig. 1 F**

|              | <b>Control shRNA</b> | <b>IL1RAP shRNA#1</b> | <b>IL1RAP shRNA#2</b> |
|--------------|----------------------|-----------------------|-----------------------|
| <b>MDS01</b> | 48                   | 14                    | 13                    |
| <b>MDS02</b> | 20                   | 8                     | 0                     |
| <b>AML03</b> | 182                  | 124                   | 57                    |
| <b>AML07</b> | 5538                 | 3268                  | 2320                  |
| <b>AML13</b> | 10                   | 7                     | 5                     |
| <b>AML15</b> | 46                   |                       | 26                    |

Table S2. **Flow cytometer configuration used for determination of FRET in Fig. 4 (C and G)**

|                      | <b>Photomultiplier tube</b> | <b>Dichroic mirror</b> | <b>Band pass filter</b> | <b>Channel</b>                        |
|----------------------|-----------------------------|------------------------|-------------------------|---------------------------------------|
| Blue laser, 488 nm   | A                           | 735LP                  | 780/60                  | PE-Cy7                                |
|                      | B                           | 635LP                  | 660/20                  | FRET                                  |
|                      | C                           | 595LP                  | 610/20                  | PE-Texas red                          |
|                      | D                           | 556/LP                 | 575/26                  | PE                                    |
|                      | E                           | 502LP                  | 530/30                  | FITC/GFP/Alexa488                     |
|                      | F                           |                        | 488/10                  | SSC                                   |
| Red laser, 633 nm    | A                           | 755LP                  | 780/60                  | APC-Cy7                               |
|                      | B                           | 690LP                  | 730/45                  | Alexa700                              |
|                      | C                           |                        | 660/20                  | APC/Alexa647                          |
| Violet laser, 407 nm | A                           | 505LP                  | 530/30                  | AmCyan/Pacific orange                 |
|                      | B                           |                        | 450/50                  | Pacific blue/eFluro450/BV421/CFP/Dapi |
